# Supplementary material
Source: PubMed Central journal article supplement (PMC2111288)
Supplement: thorax_thx.2005.056689_1.pdf [file thorax_thx.2005.056689_1.pdf]

**Appendix 1 - Factors identified by structured survey and semi-structured interviews as being important in the rapid delivery of appropriate antibiotics**

| <b>Factors</b>                                     | <b>Examples</b>                                                                                                                                                                                                                                                                                                                                                                                                                                                                      |
|----------------------------------------------------|--------------------------------------------------------------------------------------------------------------------------------------------------------------------------------------------------------------------------------------------------------------------------------------------------------------------------------------------------------------------------------------------------------------------------------------------------------------------------------------|
| <b>Knowledge, Training and Clinical Experience</b> |                                                                                                                                                                                                                                                                                                                                                                                                                                                                                      |
| Undergraduate/ postgraduate training               | Less than 50% of respondents rated their CAP training experiences as being good or excellent on a 5 point Likert scale<br>[Structured survey]                                                                                                                                                                                                                                                                                                                                        |
| Clinical experience                                | <i>Certainly when I was a lot more junior, I found a lot of difficulty remembering which antibiotics were appropriate</i><br>[Semi-structured interview]                                                                                                                                                                                                                                                                                                                             |
| Awareness/familiarity with CAP guidance            | Only 16% of respondents were able to state 3 or 4 of the four BTS core adverse prognostic markers. 57% were able to state a BTS adherent antibiotic regimen for severe CAP<br>[Structured survey]<br><br><i>I'm not familiar with them [BTS guidelines] at all, I have to say</i><br>[Semi-structured interview]                                                                                                                                                                     |
| <b>Attitudes &amp; Confidence</b>                  |                                                                                                                                                                                                                                                                                                                                                                                                                                                                                      |
| Attitudes to CAP and guidance                      | Respondents reported a <i>blasé</i> attitude towards CAP with a lower priority status in comparison to other clinical presentations ... <i>it's not quite as prioritised as much as like chest pain, which is much faster I guess the same for myocardial infarction, we can do a lot for it and minutes mean muscle to coin a phrase, whereas in pneumonia it's just pneumonia...It's the attitude to it that I see</i><br><br>In contrast attitudes about guidelines were positive |
| Confidence                                         | In the semi-structured interviews, as respondents' confidence increased use of guidance decreased. In the structured survey, however, the same respondents did not always have a sound grasp of recommended CAP practice                                                                                                                                                                                                                                                             |
| <b>Environmental Factors</b>                       |                                                                                                                                                                                                                                                                                                                                                                                                                                                                                      |
| Intensity of workload                              | <i>Busy day, busy nurses, lots to do, time for antibiotics to be made up ... other things to run through</i><br>[Semi-structured interview]                                                                                                                                                                                                                                                                                                                                          |
| Organisational factors                             | In the structured survey, only one-third of respondents rated the ward environment as being conducive to managing CAP patients well                                                                                                                                                                                                                                                                                                                                                  |
| Inter-staff communications and relations           | <i>When you're starting, it's really intimidating to try and find the Reg. on-call about what he thinks about their patient, so therefore you kind of leave it and wait for the ward round</i><br>[Semi-structured interview]                                                                                                                                                                                                                                                        |
| <b>Guideline Factors</b>                           |                                                                                                                                                                                                                                                                                                                                                                                                                                                                                      |
| Accessibility                                      | <i>... some of them are really well set-out and some of them are just pages of text and I mean it's all good stuff, but it's not easy to flick through</i><br>[Semi-structured interview]                                                                                                                                                                                                                                                                                            |
| Usability                                          |                                                                                                                                                                                                                                                                                                                                                                                                                                                                                      |
| <b>Patient &amp; Human Factors</b>                 |                                                                                                                                                                                                                                                                                                                                                                                                                                                                                      |
| Diagnosis                                          | Although respondents stated that ... <i>the [diagnostic] clues are usually there</i> , examples were given of cases in which the diagnosis of CAP had been difficult                                                                                                                                                                                                                                                                                                                 |
| Human error                                        | Occasionally, patients <i>just get forgotten</i> or ordered investigations (e.g. the chest radiograph) are not followed up                                                                                                                                                                                                                                                                                                                                                           |
