# Supplementary material
Source: PubMed Central journal article supplement (PMC2111288)

# The Tayside Critical Care Pathway for the Management of Community-Acquired Pneumonia

**PATIENT ADMITTED TO WARD 15 with SUSPECTED/PROVEN COMMUNITY-ACQUIRED PNEUMONIA**

**ALL PATIENTS SHOULD BE ASSESSED IMMEDIATELY FOR:**

- **SEVERITY** – Use severity box below to guide management. Record clearly in notes
- **ANTIBIOTICS** – **GIVE IMMEDIATELY**. Take blood culture first, but **DO NOT AWAIT** the results of a CXR. See appropriate antibiotic box below
- **OXYGEN** – Aim to keep Sa/PaO<sub>2</sub> well above 92%/8.0kPa. Do ABG if SaO<sub>2</sub> <92%. In non-COPD patients, 60-100% FiO<sub>2</sub> is safe. **COPD**: 28% and adjust according to ABG
- **IV FLUIDS** – Aim to keep BP >90/60 with good urine output (>30mls/hour)

**THE FOLLOWING SHOULD BE PERFORMED ON ALL PATIENTS:**

FBC, U&E, LFT, CRP, BLOOD CULTURE, SPUTUM CULTURE, BASELINE SEROLOGY, CXR, ECG and nursing observations 4-hourly (including RR and oximetry) until stable

**ASSESS SEVERITY of PATIENT'S PNEUMONIA**

**CORE Adverse Prognostic Features**

- **CONFUSION, NEW** (MSQ  $\leq$ 8/10)
  - **UREA** >7mmol/l (if available)
  - **RESPIRATORY RATE**  $\geq$ 30/minute
  - **BP** <90mmHg (systolic) or  $\leq$ 60mmHg (diastolic)
- PREEXISTING Adverse Prognostic Features**

- Age  $\geq$ 50 years
  - Coexisting chronic illness
- ADDITIONAL Adverse Prognostic Features**
- Pulse oximetry <92% or PaO<sub>2</sub> <8.0kPa on any FiO<sub>2</sub> (if available)
  - Bilateral or multi-lobar changes on CXR (if available)

**ADVICE ONLY**  
Respiratory Team (9-5pm) or Medical SpR (5pm-9am) via NW switchboard

**ADVICE ONLY**  
Respiratory Team (9-5pm) or Medical SpR (5pm-9am) via NW switchboard

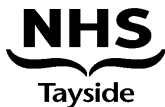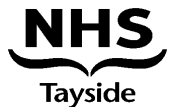

REVIEW DATE: AUGUST 2003

REVIEW DATE: AUGUST 2003

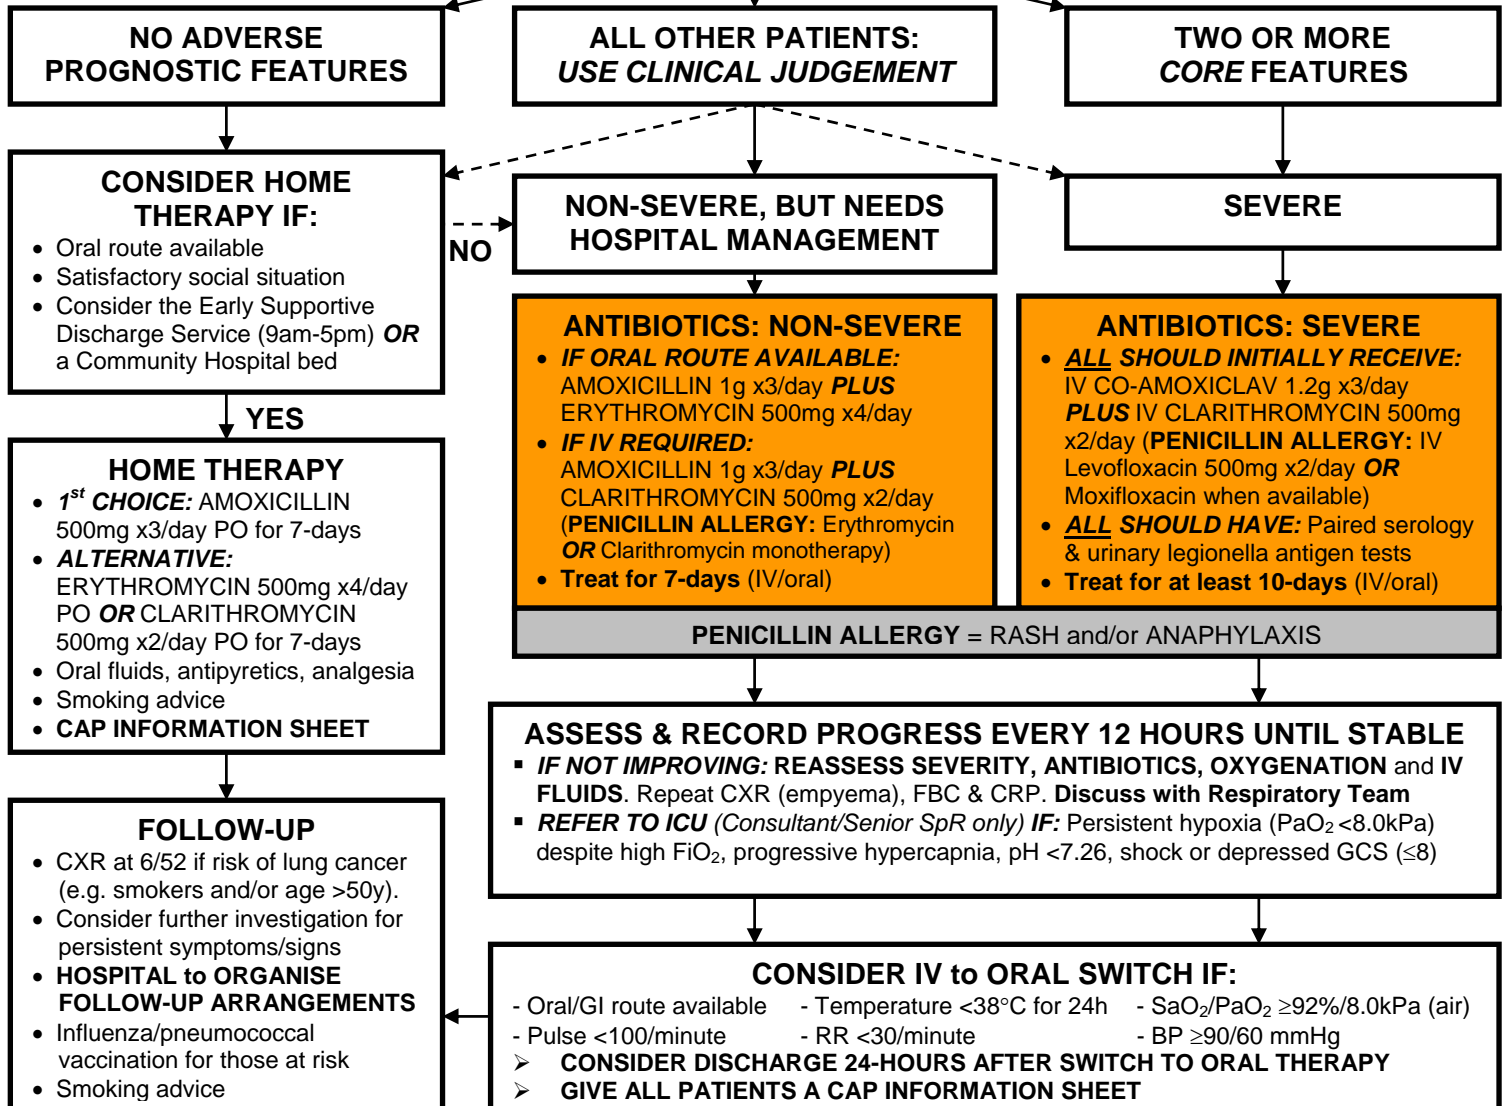

Supplement: thorax_thx.2005.056689_2.pdf [file thorax_thx.2005.056689_2.pdf]
