# Supplementary material
Source: PubMed Central journal article supplement (PMC2111288)
Supplement: thorax_thx.2005.056689_4.pdf [file thorax_thx.2005.056689_4.pdf]

## Appendix 4 - Details of personnel, development, implementation and evaluation costs

|                                                                                                                                                                                 | Total project costs from<br>the intervention hospital's<br>perspective | Costs to a hospital adapting<br>and implementing the<br>intervention and performing<br>a limited evaluation |
|---------------------------------------------------------------------------------------------------------------------------------------------------------------------------------|------------------------------------------------------------------------|-------------------------------------------------------------------------------------------------------------|
| <b>Personnel</b>                                                                                                                                                                |                                                                        |                                                                                                             |
| Clinical research fellow                                                                                                                                                        | £60558-75<br>(21-months @<br>£2883-75/month)                           | £12776-40<br>(780 hours* @<br>£16-38/hour)                                                                  |
| Secretarial support                                                                                                                                                             | £3168<br>(One day a week for<br>12-months)                             | £1584<br>(One-half day a week for<br>12-months)                                                             |
| <b>Development</b>                                                                                                                                                              |                                                                        |                                                                                                             |
| Agendas/minutes to 14 steering group members<br>(6 meetings)                                                                                                                    | £84-43                                                                 | £84-43                                                                                                      |
| Costs of steering group members to attend<br>above meetings (Consultant = 13h, GP = 10h,<br>specialist nurse = 10h, A&E SpR = 1h, senior<br>statistician = 1h)                  | £1034-42                                                               | £1034-42                                                                                                    |
| Quantitative survey (6 page questionnaire to 83<br>medical staff)                                                                                                               | £25-60                                                                 | -                                                                                                           |
| Qualitative survey (Includes cost of two courses<br>to train the research fellow, recording<br>equipment, consumables and transcription of 8<br>interviews)                     | £2648-27                                                               | -                                                                                                           |
| <b>Implementation</b>                                                                                                                                                           |                                                                        |                                                                                                             |
| Production and dissemination of<br>implementation packs <sup>1</sup> to 164 medical unit staff<br>and 37 A&E staff (Unit price = £1-49)                                         | £298-68                                                                | £298-68                                                                                                     |
| A2, A3 and A4 wall-based laminated<br>management pathways for 11 medical wards,<br>seminar rooms and doctors' offices (Unit prices:<br>A2 = £38-13; A3 = £2-23; and A4 = £1-07) | £466-46                                                                | £466-46                                                                                                     |
| Printing and dissemination of implementation<br>packs <sup>2</sup> to A&E and ward managers (Unit price<br>= £7-10)                                                             | £85-23                                                                 | £85-23                                                                                                      |
| Feedback letters (A4 letters to 121 hospital-<br>based staff on 3 occasions; unit price = £0.15)                                                                                | £53-38                                                                 | £53-38                                                                                                      |
| Educational sessions (N = 9): Includes cost of<br>posters to advertise meetings, slide production,<br>refreshments and consumables                                              | £287-13                                                                | £287-13                                                                                                     |
| <b>Evaluation</b>                                                                                                                                                               |                                                                        |                                                                                                             |
| Consumables:                                                                                                                                                                    |                                                                        |                                                                                                             |
| Intervention site                                                                                                                                                               | £178-86                                                                | £178-86                                                                                                     |
| Control site                                                                                                                                                                    | £56-89                                                                 | £56-89                                                                                                      |
| Data processing:                                                                                                                                                                |                                                                        |                                                                                                             |
| Intervention site                                                                                                                                                               | £565-50                                                                | -                                                                                                           |
| Control site                                                                                                                                                                    | £163-85                                                                | -                                                                                                           |
| Travel (One 20 mile trip to control hospital per<br>week for 12 months)                                                                                                         | £808-68                                                                | £808-68                                                                                                     |
| Miscellaneous consumables                                                                                                                                                       | £95-16                                                                 | £95-16                                                                                                      |
| <b>Total</b>                                                                                                                                                                    | <b>£70579-29</b>                                                       | <b>£17809-72</b>                                                                                            |

1. 3 page explanatory letter + A4 colour management pathway + 5 page interactive workbook + laminated A6 pocket pathway

2. 2 page explanatory letter + 10 A4 colour management pathways to disseminate to ward/unit nursing staff

\* Includes 2 hours per day for simplified prospective data collection at NW and 4 hours per week travelling and collecting data at PRI plus 52 hours for: preparing the agendas and minutes for the steering group meetings, attending steering group meetings, preparing and doing the educational sessions and continuous audit and feedback
